# Supplementary material for: A Comparison of the Immunogenicity and Safety of an Additional Heterologous versus Homologous COVID-19 Vaccination among Non-Seroconverted Immunocompromised Patients after a Two-Dose Primary Series of mRNA Vaccination: A Systematic Review and Meta-Analysis
Source: MDPI journal article supplement (doi:10.3390/vaccines12050468), 2024-04-28
Supplement: s1 [file s1]

**Table S1.** Types of immunodeficiency disorders among participants receiving an additional heterologous (viral vector) COVID-19 vaccine.

| Study        | Diagnoses |           |          |           |        |                      |          |          |          |          |         |          |         |            |               |                    |
|--------------|-----------|-----------|----------|-----------|--------|----------------------|----------|----------|----------|----------|---------|----------|---------|------------|---------------|--------------------|
|              | AIH       | Arthritis | CTD      | HTX       | HTX+MM | IgG4-related disease | KTX      | LiTX     | LiTX+KTX | LuTX     | MM      | MS       | RCC     | Vasculitis | Breast cancer | Pemphigus vulgaris |
| Bonelli 2022 | 0 (0)     | 11 (40.7) | 7 (25.9) | 0 (0)     | 0 (0)  | 2 (7.4)              | 0 (0)    | 0 (0)    | 0 (0)    | 0 (0)    | 0 (0)   | 3 (11.1) | 0 (0)   | 4 (14.8)   | 0 (0)         | 0 (0)              |
| Reindl 2022  | 0 (0)     | 0 (0)     | 0 (0)    | 0 (0)     | 0 (0)  | 0 (0)                | 98 (100) | 0 (0)    | 0 (0)    | 0 (0)    | 0 (0)   | 0 (0)    | 0 (0)   | 0 (0)      | 0 (0)         | 0 (0)              |
| Mrak 2022    | 0 (0)     | 0 (0)     | 1 (4.5)  | 10 (45.5) | 0 (0)  | 0 (0)                | 0 (0)    | 3 (13.6) | 0 (0)    | 6 (27.3) | 1 (4.5) | 0 (0)    | 1 (4.5) | 0 (0)      | 0 (0)         | 0 (0)              |
| Kho 2023     | 0 (0)     | 0 (0)     | 0 (0)    | 0 (0)     | 0 (0)  | 0 (0)                | 73 (100) | 0 (0)    | 0 (0)    | 0 (0)    | 0 (0)   | 0 (0)    | 0 (0)   | 0 (0)      | 0 (0)         | 0 (0)              |
| Total        | 0         | 11        | 8        | 10        | 0      | 2                    | 171      | 3        | 0        | 6        | 1       | 3        | 1       | 4          | 0             | 0                  |

Abbreviations: AIH, autoimmune hepatitis; CTD, connective tissue disease; HTX, heart transplant; HTX+MM, heart transplant and multiple myeloma; KTX, kidney transplant; LiTX= liver transplant, LiTX+KTX, liver transplant and kidney transplant; LuTX= lung transplant; MM, multiple myeloma; MS, multiple sclerosis; RCC, renal cell carcinoma.

**Table S2.** Types of immunodeficiency disorders among participants receiving an additional homologous (mRNA) COVID-19 vaccine.

| Study        | Diagnoses |           |          |          |         |                      |          |         |          |          |         |          |       |            |               |                    |
|--------------|-----------|-----------|----------|----------|---------|----------------------|----------|---------|----------|----------|---------|----------|-------|------------|---------------|--------------------|
|              | AIH       | Arthritis | CTD      | HTX      | HTX+MM  | IgG4-related disease | KTX      | LiTX    | LiTX+KTX | LuTX     | MM      | MS       | RCC   | Vasculitis | Breast cancer | Pemphigus vulgaris |
| Bonelli 2022 | 0 (0)     | 10 (35.7) | 9 (32.1) | 0 (0)    | 0 (0)   | 2 (7.1)              | 0 (0)    | 0 (0)   | 0 (0)    | 0 (0)    | 0 (0)   | 3 (10.7) | 0 (0) | 4 (14.3)   | 0 (0)         | 0 (0)              |
| Reindl 2022  | 0 (0)     | 0 (0)     | 0 (0)    | 0 (0)    | 0 (0)   | 0 (0)                | 99 (100) | 0 (0)   | 0 (0)    | 0 (0)    | 0 (0)   | 0 (0)    | 0 (0) | 0 (0)      | 0 (0)         | 0 (0)              |
| Mrak 2023    | 1 (4.2)   | 0 (0)     | 1 (4.2)  | 8 (33.3) | 1 (4.2) | 0 (0)                | 0 (0)    | 2 (8.3) | 1 (4.2)  | 5 (20.8) | 1 (4.2) | 2 (8.3)  | 0 (0) | 0 (0)      | 1 (4.2)       | 1 (4.2)            |
| Kho 2023     | 0 (0)     | 0 (0)     | 0 (0)    | 0 (0)    | 0 (0)   | 0 (0)                | 73 (100) | 0 (0)   | 0 (0)    | 0 (0)    | 0 (0)   | 0 (0)    | 0 (0) | 0 (0)      | 0 (0)         | 0 (0)              |
| Total        | 1         | 10        | 10       | 8        | 1       | 2                    | 172      | 2       | 1        | 5        | 1       | 5        | 0     | 4          | 1             | 1                  |

Abbreviations: AIH, autoimmune hepatitis; CTD, connective tissue disease; HTX, heart transplant; HTX+MM, heart transplant and multiple myeloma; KTX, kidney transplant; LiTX= liver transplant, LiTX+KTX, liver transplant and kidney transplant; LuTX= lung transplant; MM, multiple myeloma; MS, multiple sclerosis; RCC, renal cell carcinoma.

**Table S3.** Risk of bias of the included studies, assessed using Cochrane RoB-2 tool.

| <b>Study</b> | <b>Randomization process</b> | <b>Deviations from the intended interventions</b> | <b>Missing outcome data</b> | <b>Measurement of the outcome</b> | <b>Selection of the reported result</b> | <b>Overall risk of bias</b> |
|--------------|------------------------------|---------------------------------------------------|-----------------------------|-----------------------------------|-----------------------------------------|-----------------------------|
| Bonelli 2022 | Low risk                     | Low risk                                          | Low risk                    | Low risk                          | Low risk                                | Low risk                    |
| Reindl 2022  | Low risk                     | Low risk                                          | Low risk                    | Low risk                          | Low risk                                | Low risk                    |
| Mrak 2022    | Low risk                     | Low risk                                          | Low risk                    | Low risk                          | Low risk                                | Low risk                    |
| Kho 2023     | Low risk                     | Low risk                                          | Low risk                    | Low risk                          | Low risk                                | Low risk                    |

**Table S4.** Certainty of evidence of the outcomes of interests, assessed using the Grading of Recommendations Assessment, Development and Evaluation (GRADE) approach.

| Outcome                                         | Initial certainty of evidence | Domain          |                     |                 |                                        |                                                  |                   |                        |                                    | Overall certainty of evidence |
|-------------------------------------------------|-------------------------------|-----------------|---------------------|-----------------|----------------------------------------|--------------------------------------------------|-------------------|------------------------|------------------------------------|-------------------------------|
|                                                 |                               | Lower if        |                     |                 |                                        |                                                  | Higher if         |                        |                                    |                               |
|                                                 |                               | Risk of bias    | Inconsistency       | Indirectness    | Imprecision                            | Publication bias                                 | Large effect size | Dose-response gradient | All plausible residual confounding |                               |
| Anti-S IgG seropositivity rate                  | High (RCTs)                   | 0 (no evidence) | -1 ( $I^2 = 63\%$ ) | 0 (no evidence) | -1 (95% CI overlapped the null effect) | -1 (no quantitative results of publication bias) | 0 (no evidence)   | 0 (no evidence)        | 0 (no evidence)                    | Very low                      |
| SARS-CoV-2-specific T-cell immune response rate |                               |                 | 0 ( $I^2 = 0\%$ )   |                 | -1 (95% CI overlapped the null effect) |                                                  |                   |                        |                                    | Low                           |
| Pain at injection site                          |                               |                 | 0 ( $I^2 = 0\%$ )   |                 | 0 (no evidence)                        |                                                  |                   |                        |                                    | Moderate                      |
| Headache                                        |                               |                 | 0 ( $I^2 = 0\%$ )   |                 | 0 (no evidence)                        |                                                  |                   |                        |                                    | Moderate                      |
| Fatigue                                         |                               |                 | 0 ( $I^2 = 49\%$ )  |                 | 0 (no evidence)                        |                                                  |                   |                        |                                    | Moderate                      |
| Myalgia                                         |                               |                 | 0 ( $I^2 = 38\%$ )  |                 | 0 (no evidence)                        |                                                  |                   |                        |                                    | Moderate                      |
| Arthralgia                                      |                               |                 | 0 ( $I^2 = 0\%$ )   |                 | 0 (no evidence)                        |                                                  |                   |                        |                                    | Moderate                      |
